# Supplementary material for: Perspectives on life participation by young adults with chronic kidney disease: an interview study
Source: PubMed Central journal article supplement — BMJ Open. 2020 Oct 16;10(10):e037840. doi: 10.1136/bmjopen-2020-037840 (PMC7569939; doi:10.1136/bmjopen-2020-037840), 2020-10-16
Supplement: bmjopen-2020-037840supp001.pdf [file bmjopen-2020-037840supp001.pdf]

**Supplementary File 1. COREQ Checklist**

| No.                                            | Item                                     | Comment                                                                                                                                                       | Page       | Line(s) |
|------------------------------------------------|------------------------------------------|---------------------------------------------------------------------------------------------------------------------------------------------------------------|------------|---------|
| <b>Domain 1: Research team and reflexivity</b> |                                          |                                                                                                                                                               |            |         |
| 1                                              | Interview/facilitator                    | JK                                                                                                                                                            | 6          | 19      |
| 2                                              | Credentials                              | JK (MD)                                                                                                                                                       | 1          | 4       |
| 3                                              | Occupation                               | JK, Medical Student                                                                                                                                           | 6          | 19      |
| 4                                              | Gender                                   | JK (Female)                                                                                                                                                   | 6          | 19      |
| 5                                              | Experience and training                  | Completed training in qualitative research                                                                                                                    | 6          | 19      |
| 6                                              | Relationship established                 | There were no prior relationships established                                                                                                                 | 6          | 21      |
| 7                                              | Participant knowledge of the interviewer | Not known to participants prior to the study                                                                                                                  | 6          | 21      |
| 8                                              | Interviewer characteristics              | Female, medical student                                                                                                                                       | 6          | 19      |
| <b>Study design</b>                            |                                          |                                                                                                                                                               |            |         |
| 9                                              | Theoretical framework                    | Qualitative study (using techniques from grounded theory)                                                                                                     | 6          | 27      |
| 10                                             | Sampling                                 | Purposive                                                                                                                                                     | 6          | 12      |
| 11                                             | Method of approach                       | Email/phone                                                                                                                                                   | 6          | 10      |
| 12                                             | Sample size                              | N=30 See table 1                                                                                                                                              | 7          | 21      |
| 13                                             | Non-participation                        | Non-participation (3) was due to refusal, illness, or inability to schedule an interview after three attempts                                                 | 7          | 23      |
| 14                                             | Setting of data collection               | A venue as preferred by the participant, or by video conference using zoom                                                                                    | 6          | 20      |
| 15                                             | Presence of non-participants             | Yes, a parent was present in five interviews.                                                                                                                 | 7          | 27      |
| 16                                             | Description of sample                    | Table 1                                                                                                                                                       | 7 (and T1) | 21-26   |
| 17                                             | Interview guide                          | Provided in Supplementary File 3                                                                                                                              | 6 (and S3) | 16-17   |
| 18                                             | Repeat interviews                        | Single interview conducted                                                                                                                                    | 6          | 19      |
| 19                                             | Audio/visual recording                   | Interviews were audio recorded                                                                                                                                | 6          | 23      |
| 20                                             | Field notes                              | No, not taken                                                                                                                                                 | 6          | 24      |
| 21                                             | Duration                                 | The mean duration of the interviews was 53 minutes.                                                                                                           | 7          | 26-27   |
| 22                                             | Data saturation                          | Yes                                                                                                                                                           | 6          | 22-23   |
| 23                                             | Transcripts returned                     | Yes                                                                                                                                                           | 7          | 4-5     |
| <b>Analysis and findings</b>                   |                                          |                                                                                                                                                               |            |         |
| 24                                             | Number of data coders                    | 1 (JK)                                                                                                                                                        | 7          | 1       |
| 25                                             | Description of the coding tree           | No – see themes                                                                                                                                               | NR         | -       |
| 26                                             | Derivation of themes                     | Inductively derived from data                                                                                                                                 | 7          | 1       |
| 27                                             | Software                                 | HyperRESEARCH                                                                                                                                                 | 6          | 27      |
| 28                                             | Participant checking                     | Yes, participants were emailed a copy of the preliminary findings and invited to provide comments and we used investigator triangulation (JK, EH, CH and AT). | 7          | 3-6     |
| 29                                             | Quotations presented                     | Table 2                                                                                                                                                       | Table 2    | -       |
| 30                                             | Data and findings consistent             | Quotations provided to illustrate each theme.                                                                                                                 | 8 - 14     | 16 - 14 |
| 31                                             | Clarity of major themes                  | Yes – themes                                                                                                                                                  | 8          | 4-6     |
| 32                                             | Clarity of minor themes                  | Yes – see subthemes and description of the themes                                                                                                             | 8          | 4-6     |
