# Supplementary material for: Perspectives on life participation by young adults with chronic kidney disease: an interview study
Source: PubMed Central journal article supplement — BMJ Open. 2020 Oct 16;10(10):e037840. doi: 10.1136/bmjopen-2020-037840 (PMC7569939; doi:10.1136/bmjopen-2020-037840), 2020-10-16
Supplement: bmjopen-2020-037840supp002.pdf [file bmjopen-2020-037840supp002.pdf]

**Supplementary File 2. Ethics approval**

Ethics Committee(s) and/or Institutional Board(s) that approved this study (+ number/ID):

- The University of Sydney, Sydney, NSW, Australia (2017304)
- The Sydney Children's Hospital Network, Western Sydney Local Health District, Sydney, NSW, Australia (8718)
- Royal Children's Hospital, Monash Health, Melbourne, VIC, Australia (13082B)
- Princess Alexandra Hospital, Metro South Health, Brisbane, QLD, Australia (17QPAH/112)
